# Supplementary material for: VEGF/Flk1 Mechanism is Involved in Roxarsone Promotion of Rat Endothelial Cell Growth and B16F10 Xenograft Tumor Angiogenesis
Source: PubMed Central journal article supplement (PMC6874592; doi:10.1038/s41598-019-53870-3), 2019-11-22

**VEGF/Flk1 Mechanism Is Involved in Roxarsone Promotion of Rat Endothelial Cells Growth and B16F10 Xenograft Tumor Angiogenesis**

Shihao Chen<sup>1,2†</sup>, Jinge Xu<sup>1,3†</sup>, Qianhan Wei<sup>1</sup>, Zeting Zhao<sup>1,2</sup>, Xin Chen<sup>1</sup>, Hengmi Cui<sup>2\*</sup>, Yumei Zhang<sup>1,4\*</sup>

1 College of Veterinary Medicine, Yangzhou University, Yangzhou, Jiangsu, China;

2 College of Animal Science and Technology, Yangzhou University, Yangzhou, Jiangsu, China;

3 Guizhou Animal Husbandry and Veterinary Research Institute, Guiyang, Guizhou, China;

4 Jiangsu Co-innovation Center for Prevention and Control of Important Animal Infectious Diseases and Zoonoses, Yangzhou, Jiangsu, China

† Shihao Chen and Jinge Xu should be considered joint first author.

\* Hengmi Cui and Yumei Zhang should be considered joint corresponding author. Hengmi Cui, College of Animal Science and Technology, Yangzhou University, No. 12 East Wenhui Road, Yangzhou, Jiangsu 225009, China. Tel.: 86 514 87979032, Fax: 86 514 87350440, E-mail address: hmcui@yzu.edu.cn; Yumei Zhang, College of Veterinary Medicine, Yangzhou University, No. 12 East Wenhui Road, Yangzhou, Jiangsu 225009, China. Tel.: 86 514 87979044, Fax: 86 514 87972218, E-mail address: ymzhnet@sina.com.cn.

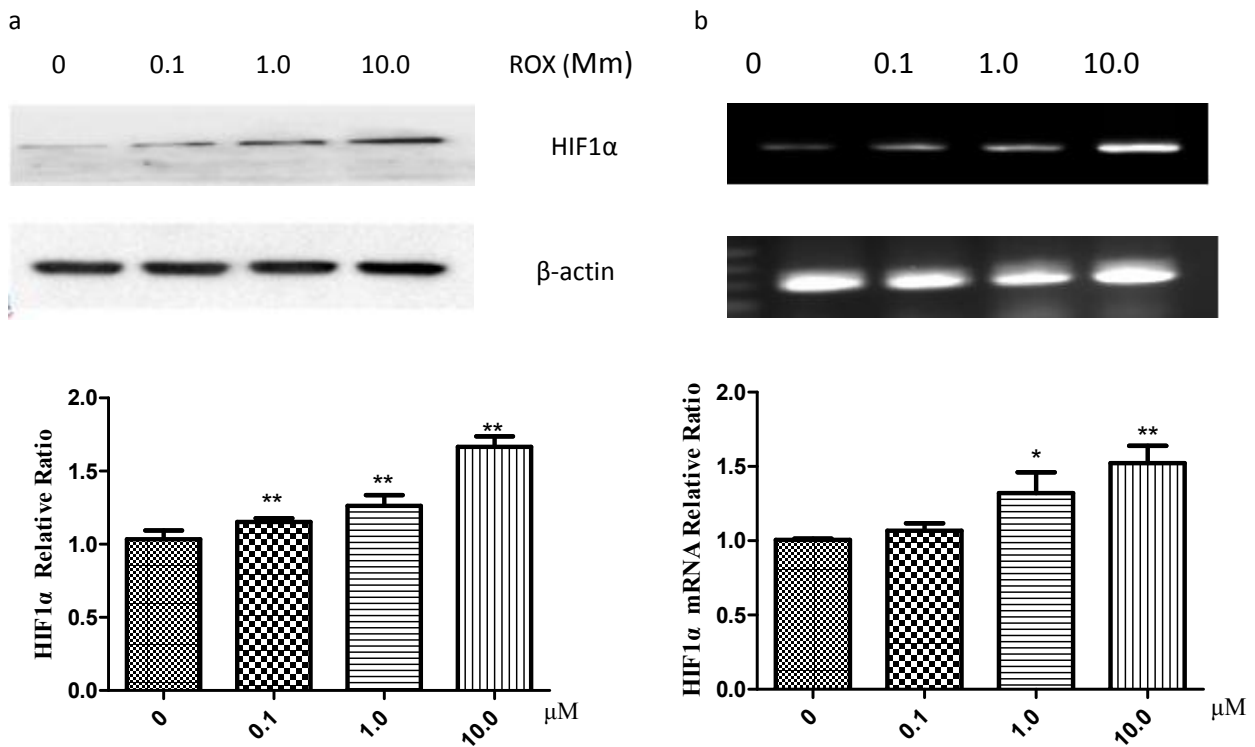

**Figure S Effect of roxarsone on the expression of HIF1α in EC cultures.**

a, Western blotting of total cell lysates from ECs treated with 0, 0.1, 1.0 and 10.0 μM ROX. Values are the mean ± SD of HIF1α expression standardized to β-actin expression in three independent experiments. b, RT-PCR analysis from ECs treated with 0, 0.1, 1.0 and 10.0 μM ROX. Values are the mean ± SD of HIF1α expression standardized to β-actin expression in three independent experiments. \* $P < 0.05$ , \*\* $P < 0.01$  relative to PBS by ANOVA.

The original WB bands of HIF1 $\alpha$  in Fig. S

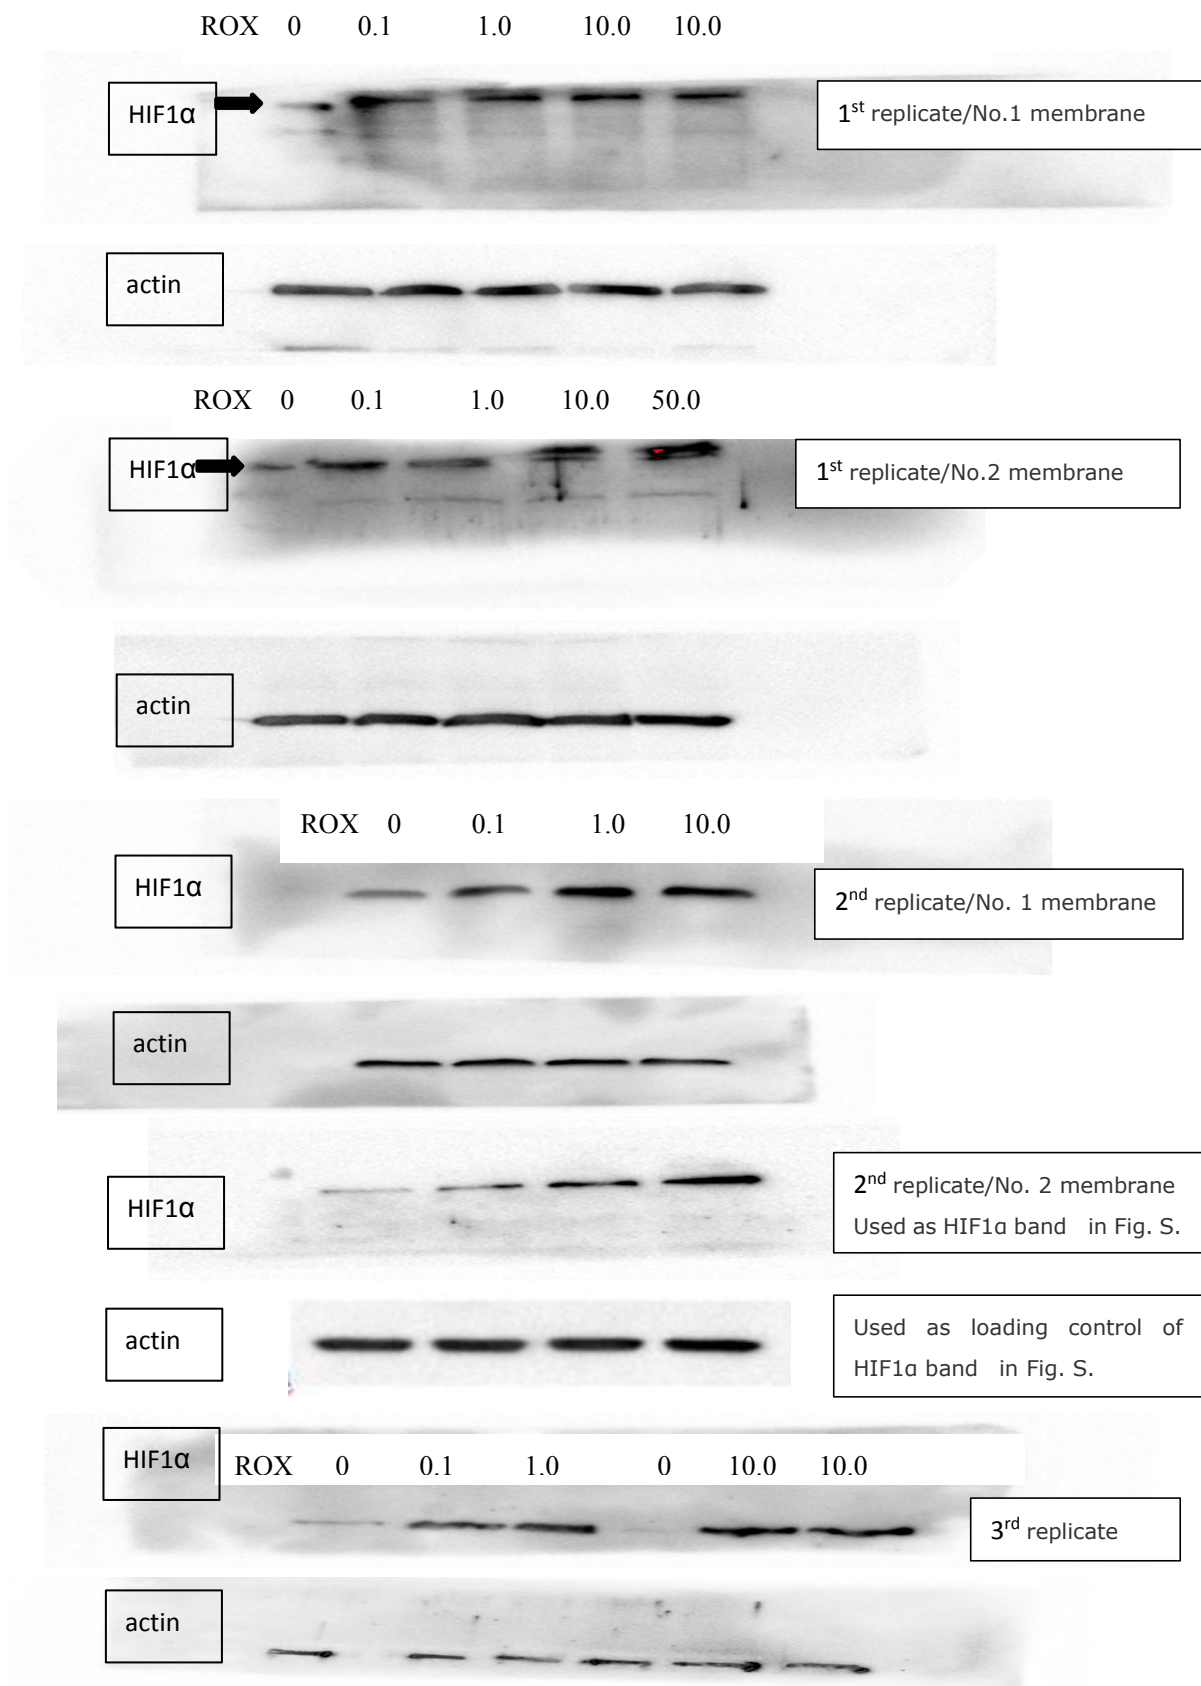

Some original images of WB or box-plot figures as below.

The WB bands for VEGF and Flk1/Flt1 used in Fig. 5

**VEGF:**

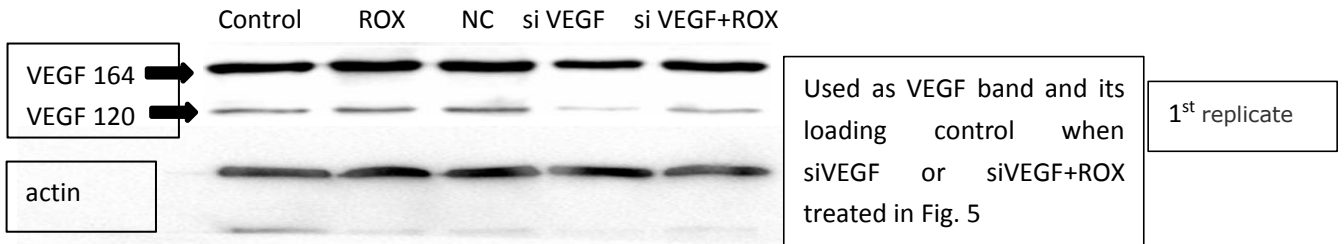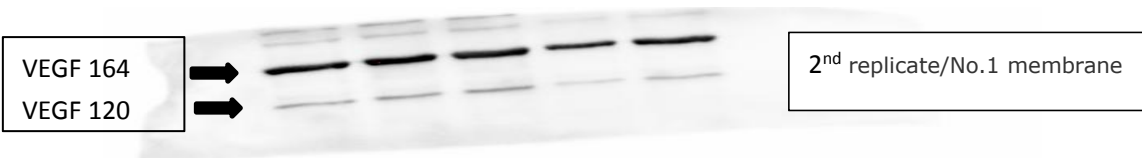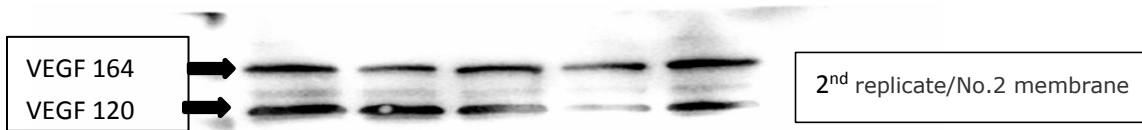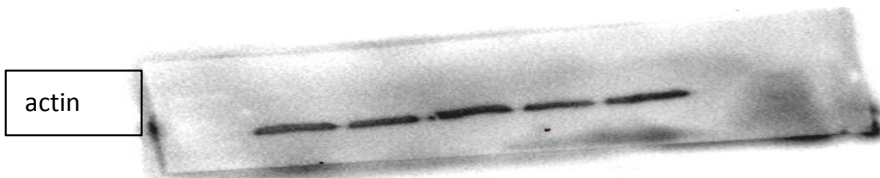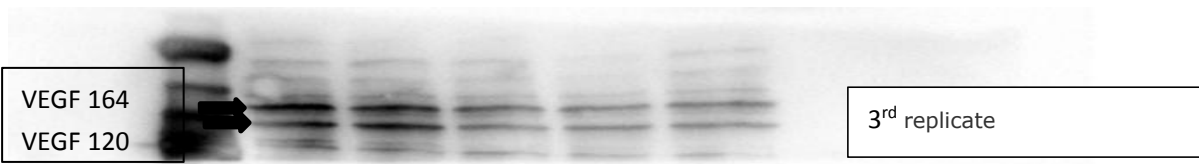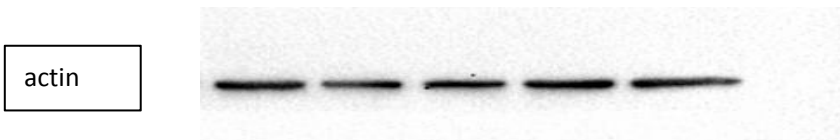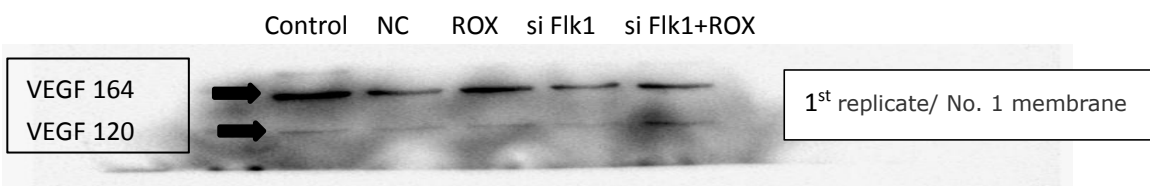

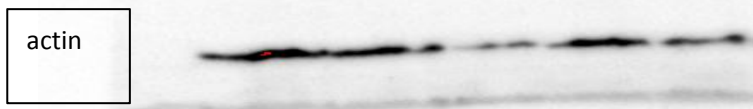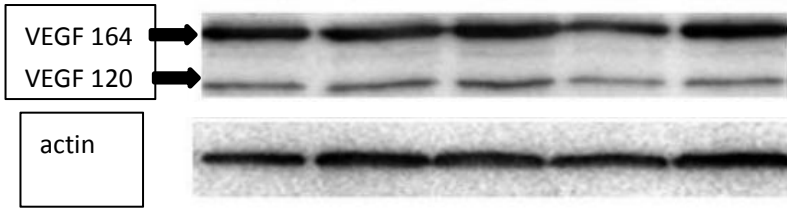

1<sup>st</sup> replicate/ No. 2 membrane  
Used as VEGF band and its loading control when siFlk1 or siFlk1+ROX treated in Fig. 5.

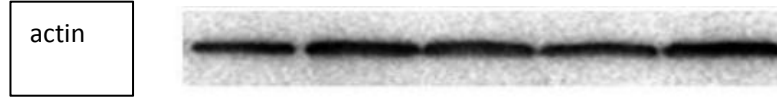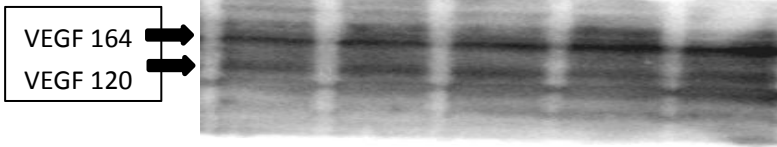

2<sup>nd</sup> replicate

Control    NC    ROX    si Flk1+ROX    si Flk1

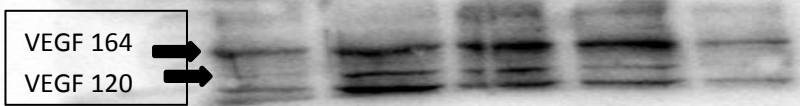

3<sup>rd</sup> replicate

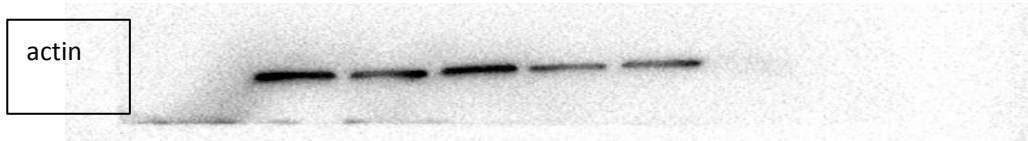

**Flk1:**

Control    ROX    NC    si Flk1    si Flk1+ROX

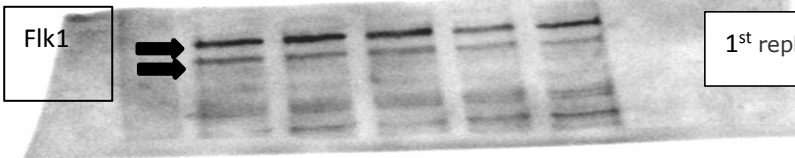

1<sup>st</sup> replicate/No. 1 membrane

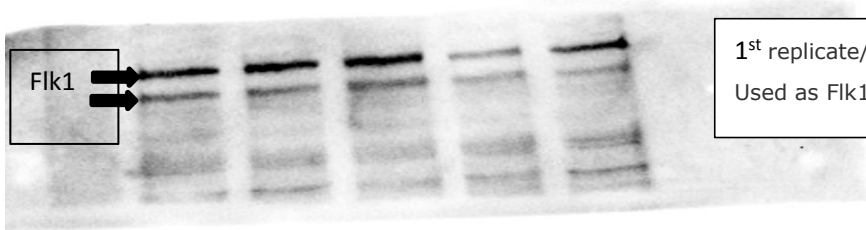

1<sup>st</sup> replicate/No. 2 membrane  
Used as Flk1 band in Fig. 5.

actin

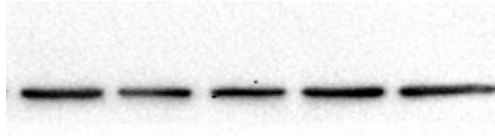

Used as loading control of Flk1  
WB in Fig. 5

Control Control NC ROX siFlk1+ROX siFlk1

Flk1

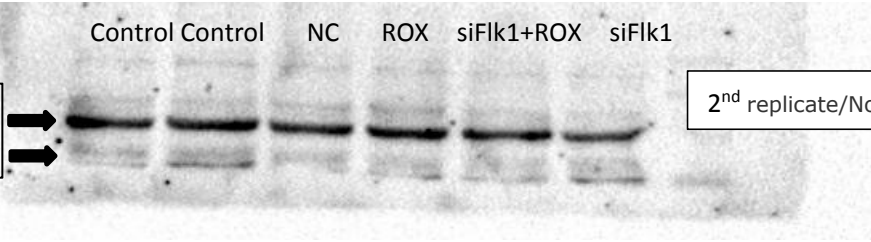

2<sup>nd</sup> replicate/No. 1 membrane

Flk1

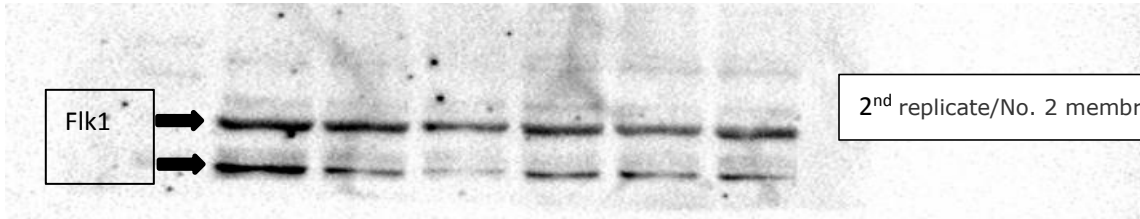

2<sup>nd</sup> replicate/No. 2 membrane

actin

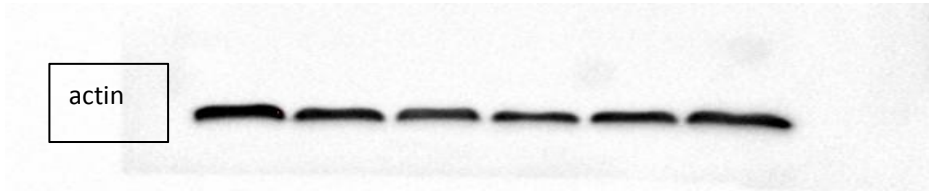

Flk1

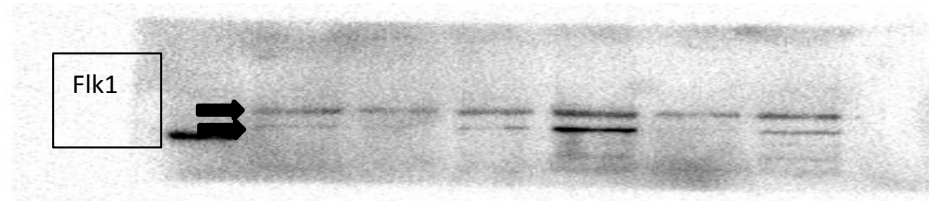

3<sup>rd</sup> replicate

actin

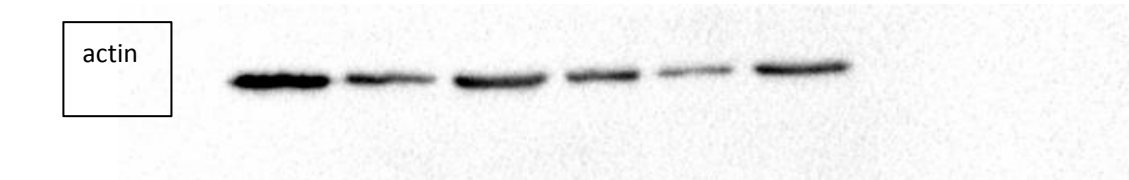

**Flt1:**

Control ROX NC si Flt1 si Flt1+ROX

Flt1

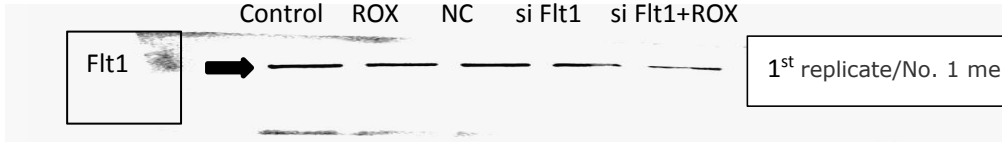

1<sup>st</sup> replicate/No. 1 membrane

actin

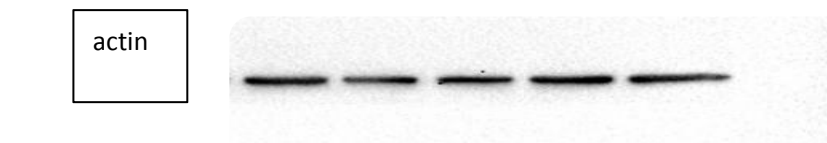

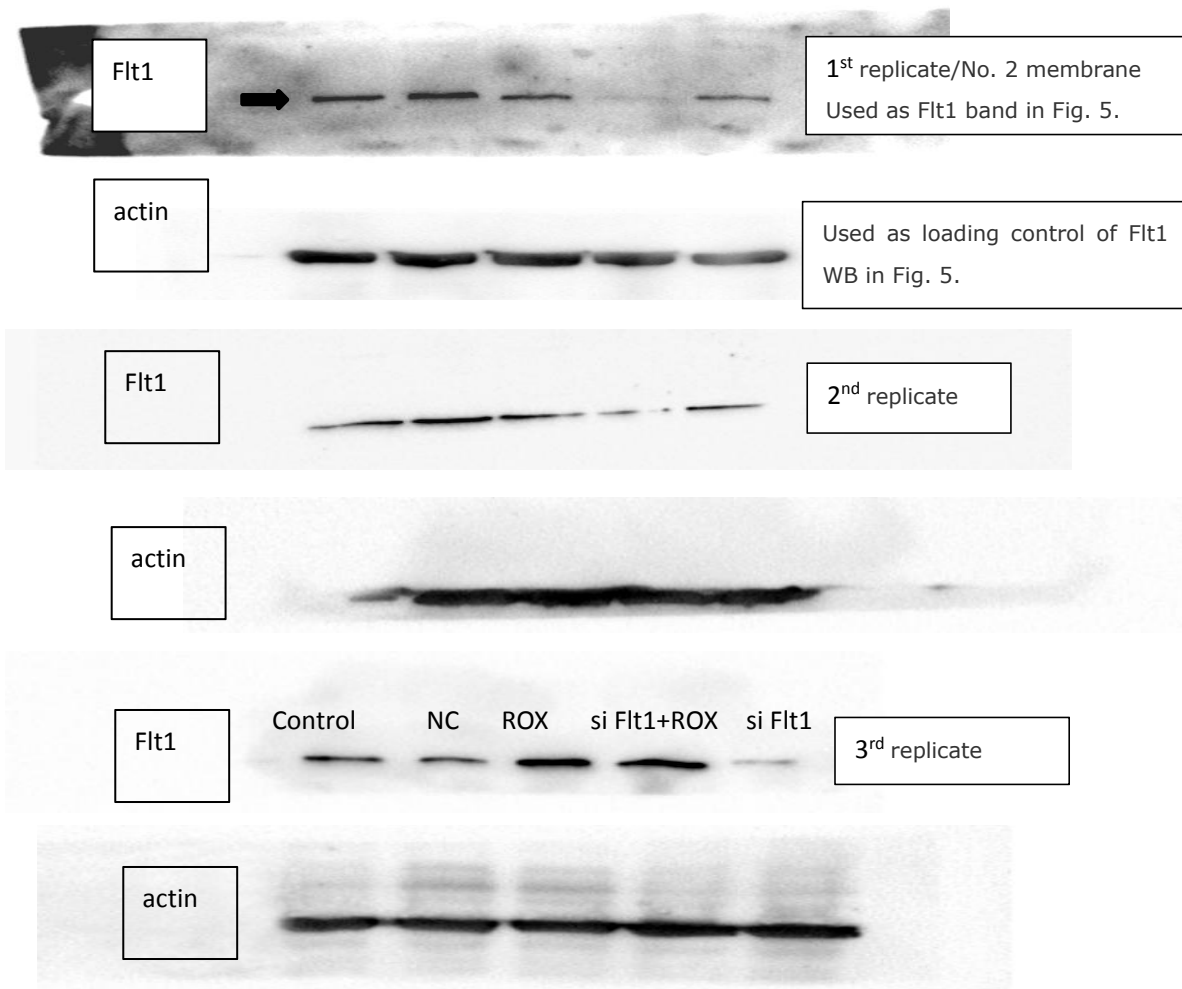

The WB bands of VEGF and Flk1 in B16F10 tumors used in Fig. 7c

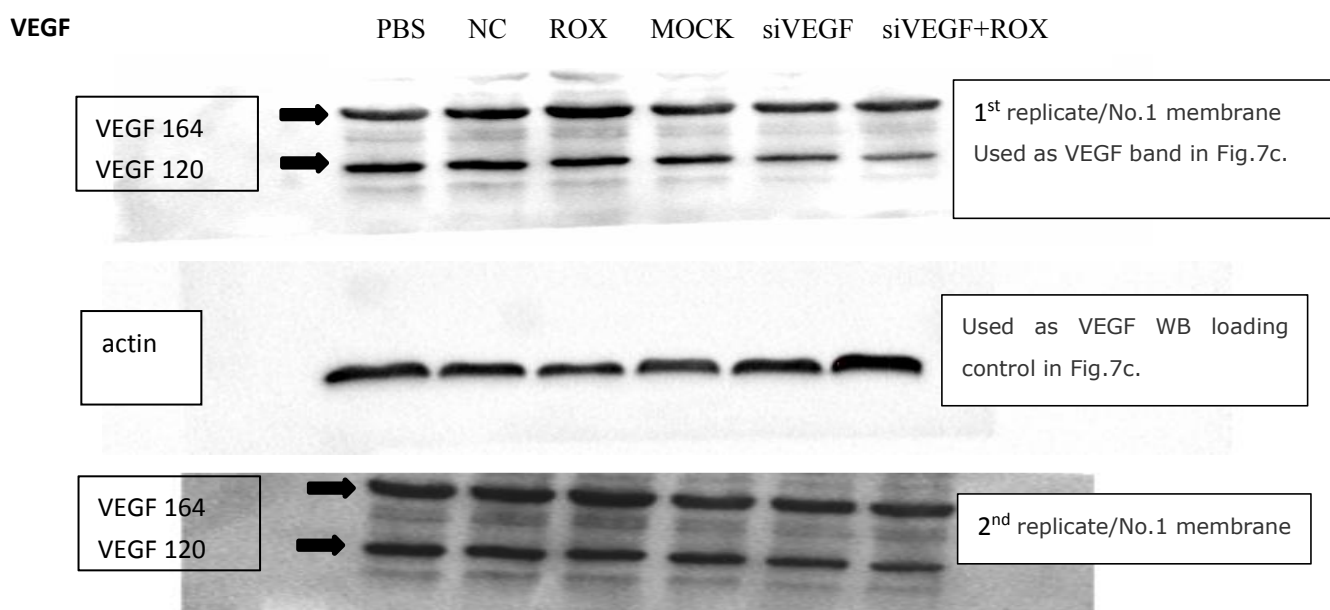

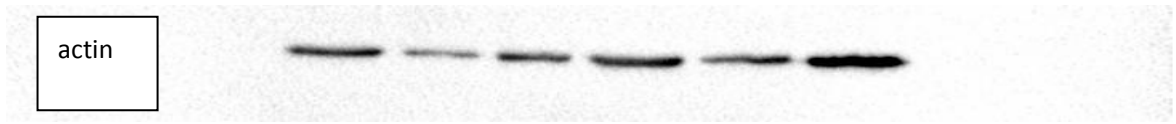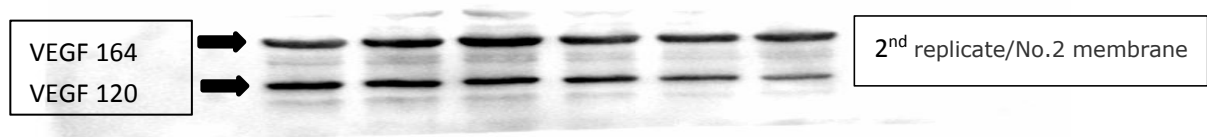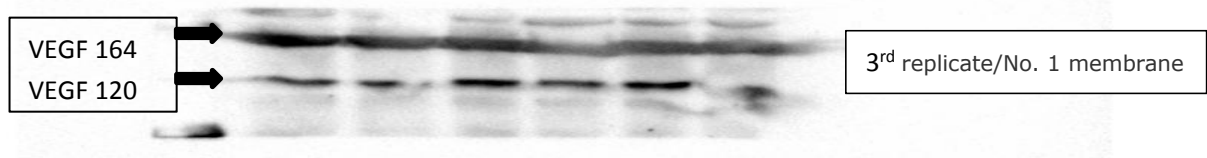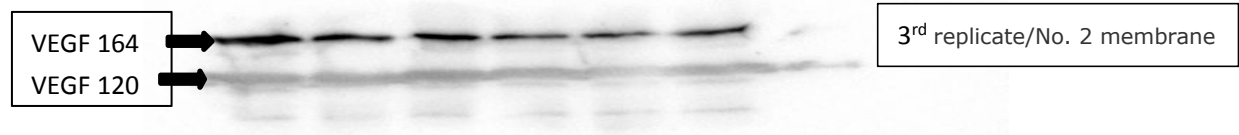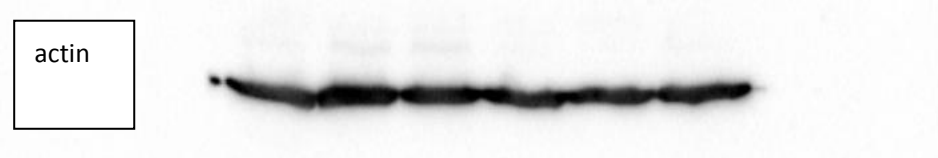

**Flk1:**

PBS ROX MOCK NC siVEGF siVEGF+ROX

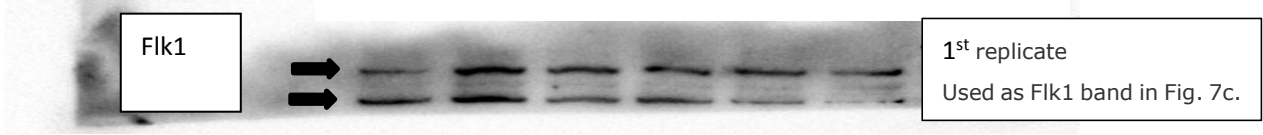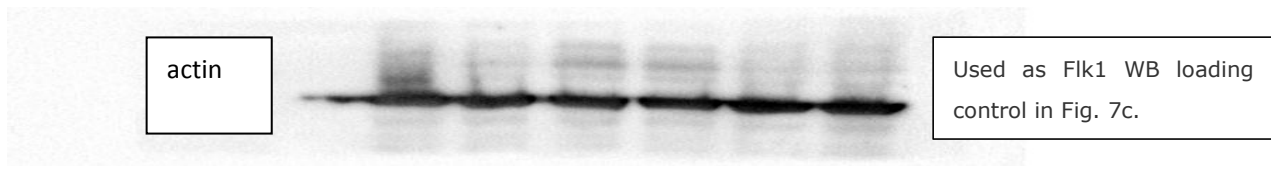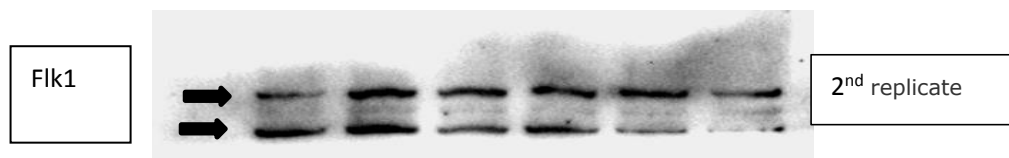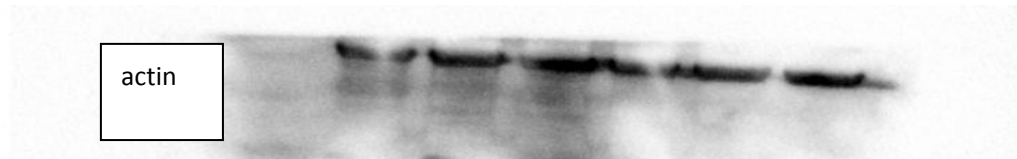



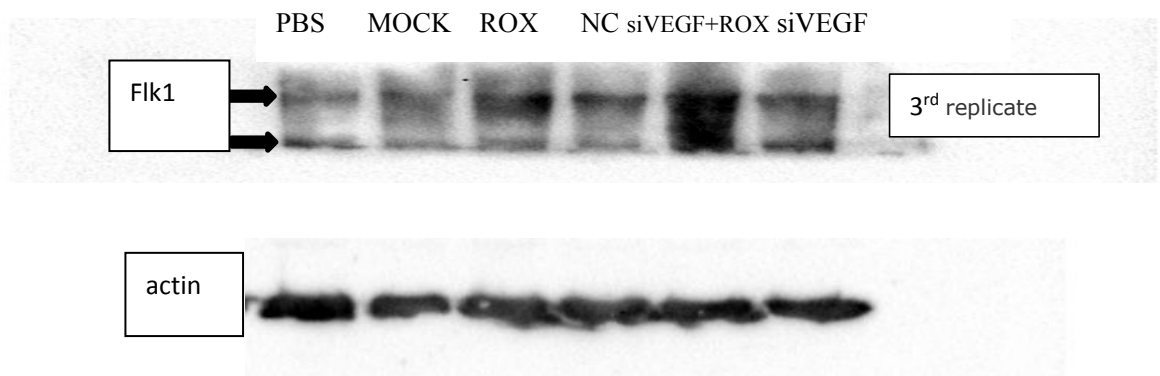

The bands of HIF by WB used in Fig.2c4

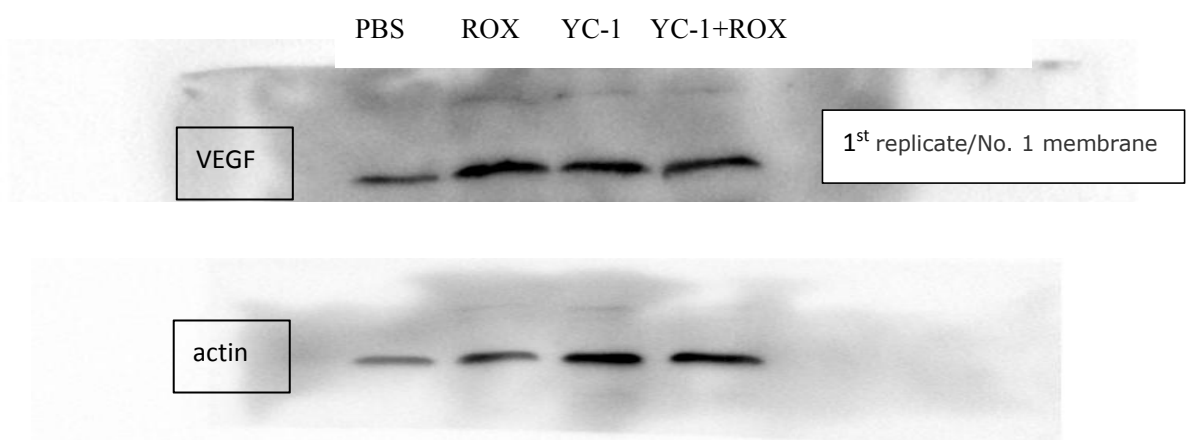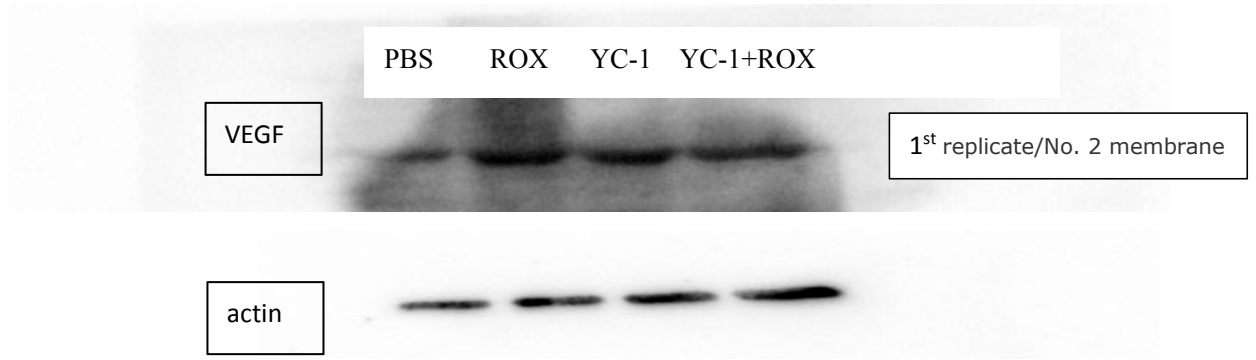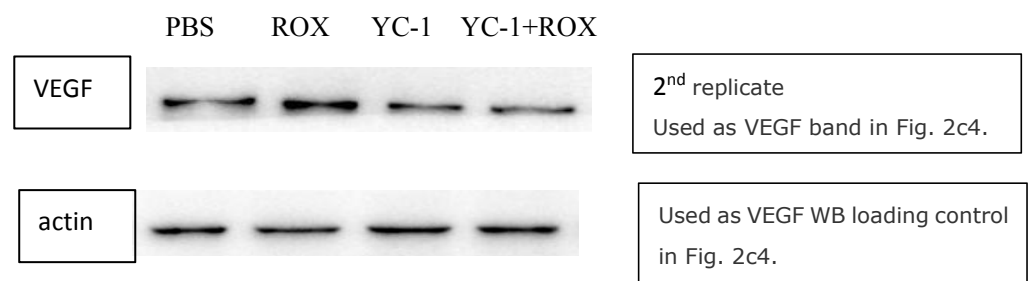

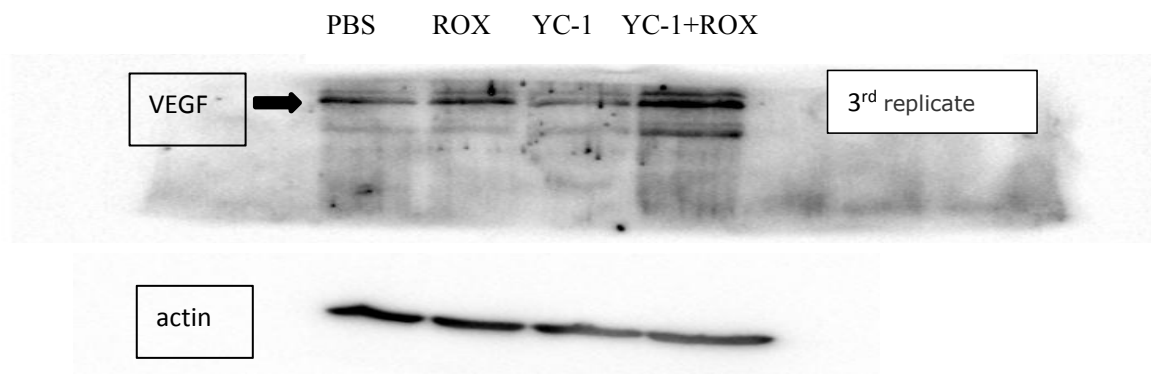

### The Relative VEGF data by WB in Fig.2c3

Fig.2c3 VEGF level by WB

|   | PBS    | ROX 1.0 | ROX 1.0+anti-Flt1 | ROX 1.0+anti-Flk1 | anti-Flt1 | anti-Flk1 | anti-VEGF |
|---|--------|---------|-------------------|-------------------|-----------|-----------|-----------|
| 1 | 1.0021 | 1.1414  | 1.0849            | 1.0364            | 0.9895    | 0.9529    | 0.981     |
| 2 | 1.0111 | 1.1492  | 1.0928            | 1.0411            | 1.0013    | 0.9502    | 0.9768    |
| 3 | 0.9935 | 1.1339  | 1.0771            | 1.0316            | 0.9781    | 0.9611    | 0.9921    |

### The Relative VEGF data by WB in Fig.1d

Relative VEGF

|   | Control | VEGF   | Rox 0.1 | Rox 1.0 | Rox 10.0 | Rox 50.0 |
|---|---------|--------|---------|---------|----------|----------|
| 1 | 1       | 1.2054 | 1.0317  | 1.1414  | 1.0369   | 1.0202   |
| 2 | 1       | 1.2097 | 1.0437  | 1.145   | 1.0483   | 1.021    |
| 3 | 1       | 1.1843 | 1.0426  | 1.1377  | 1.0403   | 1.0225   |

Some box-plot figures as below:

Figure 3

b

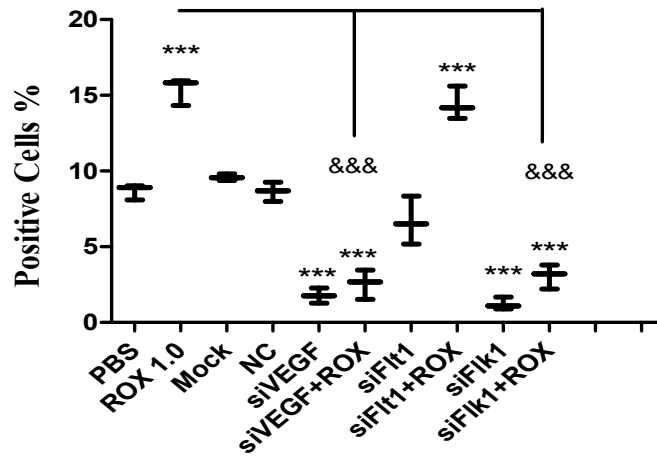

d

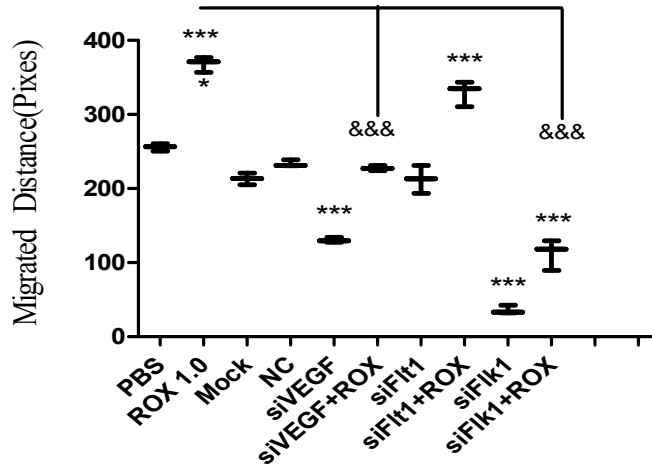

Figure 4b

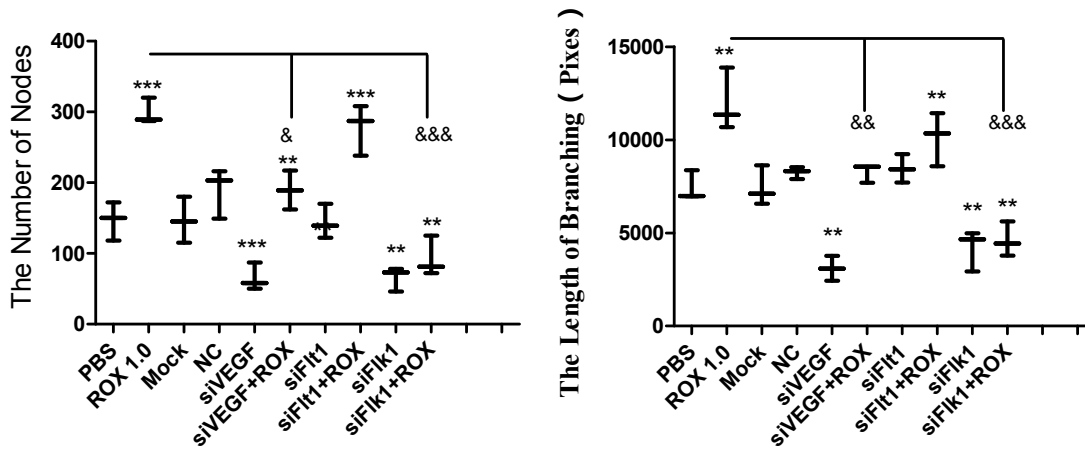

Figure 5b

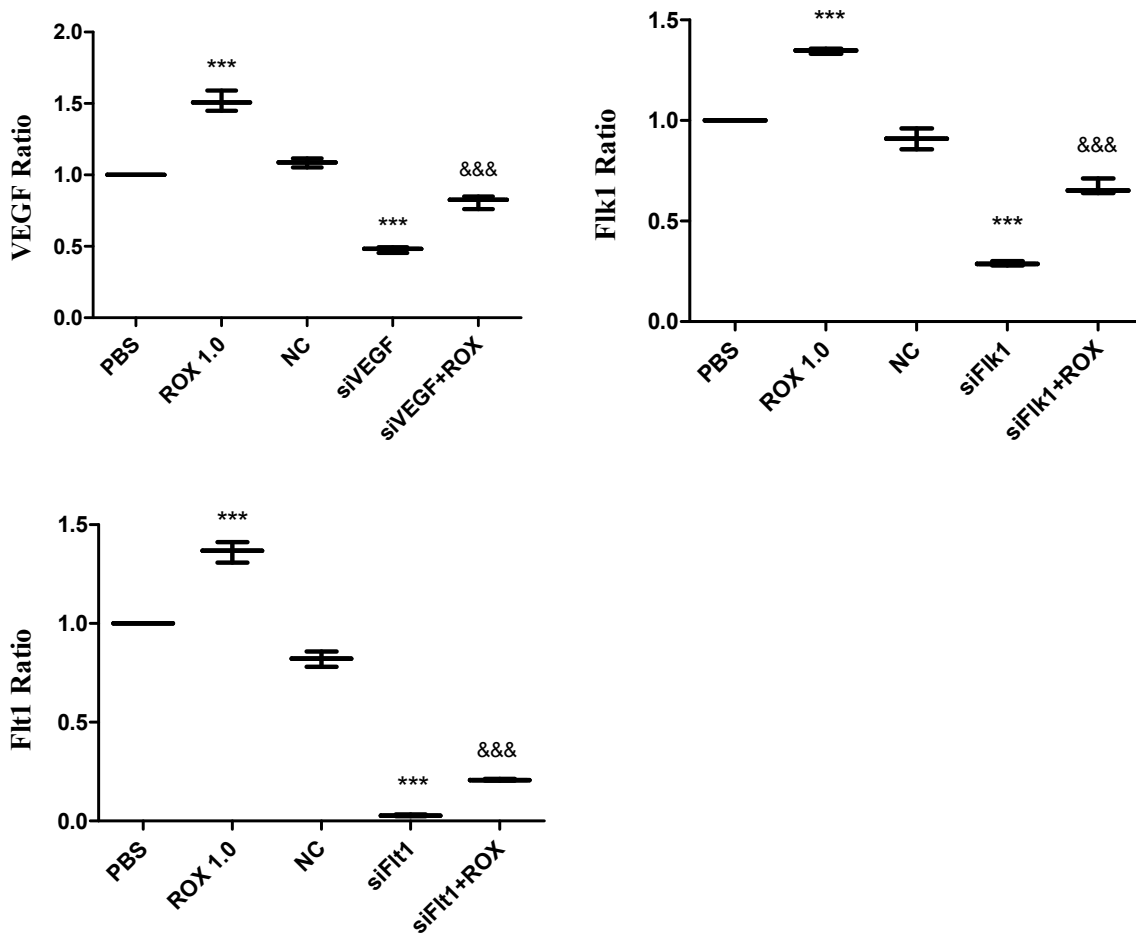

Figure 6b

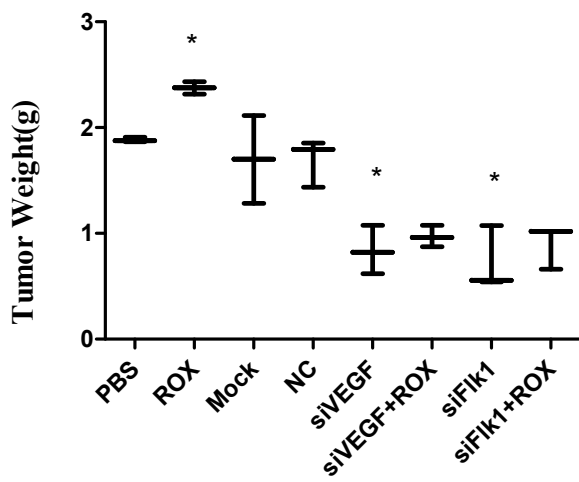

Figure 7b

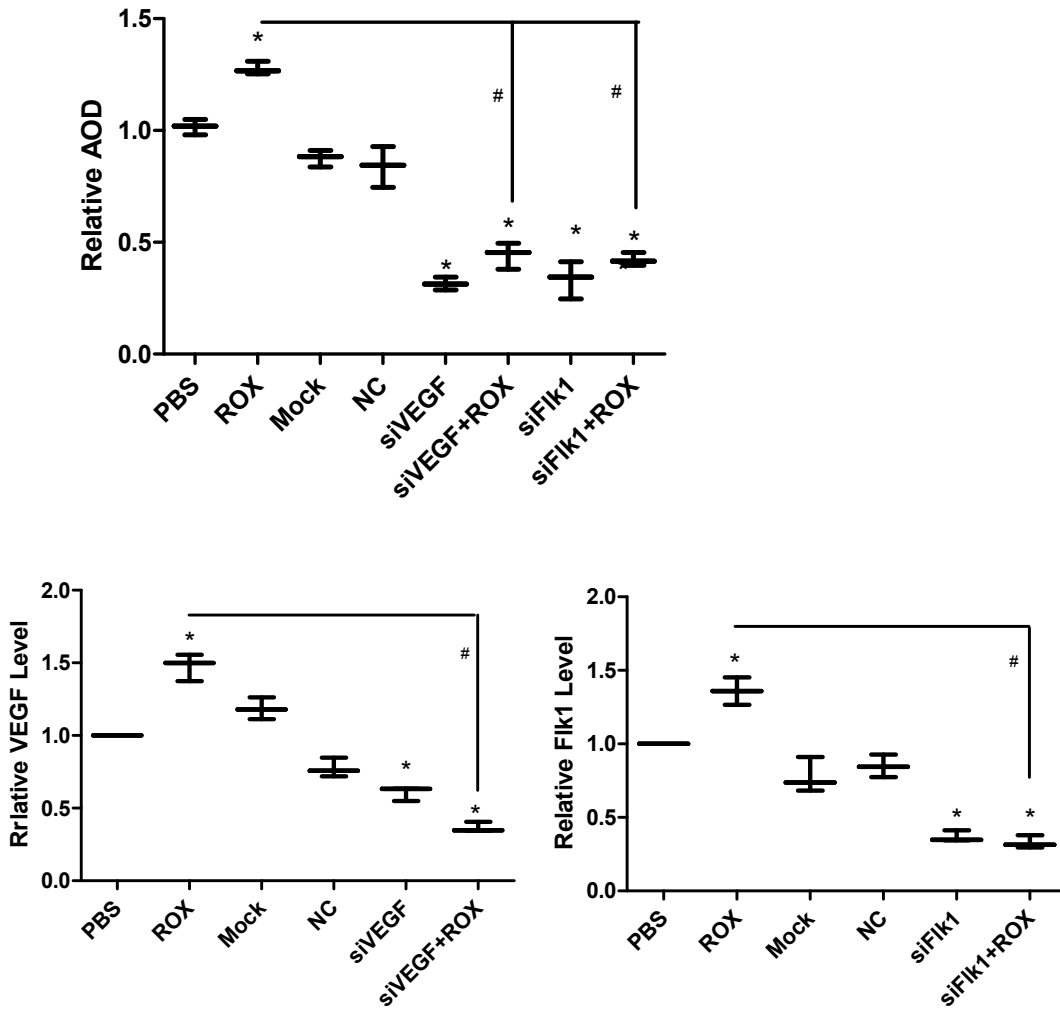

Supplement: 41598_2019_53870_MOESM2_ESM.pdf [file 41598_2019_53870_MOESM2_ESM.pdf]
